# Supplementary material
Source: PubMed Central journal article supplement (PMC1177385)
Supplement: pnas_0503862102_1.pdf [file pnas_0503862102_1.pdf]

**Table 1. Removal of NF-M/H tail domains protects against motor neuron degeneration in SOD1-mediated ALS in mice**

| <b>Ventral (Motor) Root Axon Number (per L5 Root)</b>                           |                                   |                                                                   |                                                               |                                                           |                                                           |                       |
|---------------------------------------------------------------------------------|-----------------------------------|-------------------------------------------------------------------|---------------------------------------------------------------|-----------------------------------------------------------|-----------------------------------------------------------|-----------------------|
| <b>NF-(M/H)<sup>wild-type</sup></b><br>(control mice, at 14 months and healthy) | <b>NF-(M/H)<sup>tailΔ</sup></b>   | <b>NF-(M/H)<sup>wild-type</sup></b><br><b>SOD1<sup>G37R</sup></b> | <b>NF-(M/H)<sup>tailΔ</sup></b><br><b>SOD1<sup>G37R</sup></b> | <b>NF-M<sup>tailΔ</sup></b><br><b>SOD1<sup>G37R</sup></b> | <b>NF-H<sup>tailΔ</sup></b><br><b>SOD1<sup>G37R</sup></b> |                       |
|                                                                                 |                                   | presymptomatic:                                                   | <b>1032 ± 19 (n=3)</b>                                        | <b>862 ± 78 (n=3)</b>                                     | <b>ND</b>                                                 | <b>ND</b>             |
| <b>1008 ± 61 (n=3)</b>                                                          | <b>862 ± 58 (n=4)</b>             | hind limb weakness:                                               | <b>517 ± 29 (n=4)</b>                                         | <b>724 ± 26 (n=3)</b>                                     | <b>525 ± 52 (n=3)</b>                                     | <b>580 ± 91 (n=2)</b> |
|                                                                                 |                                   | end stage:                                                        | <b>374 ± 29 (n=4)</b>                                         | <b>613 ± 51 (n=3)</b>                                     | <b>384 ± 33 (n=3)</b>                                     | <b>460 ± 31 (n=4)</b> |
| <b>Lumbar Ventral Horn Motor Neuron Number (per L3-L6 Section)</b>              |                                   |                                                                   |                                                               |                                                           |                                                           |                       |
| <b>NF-(M/H)<sup>wild-type</sup></b><br>(control mice, at 14 months and healthy) | <b>NF-(M/H)<sup>tailΔ</sup></b>   | <b>NF-(M/H)<sup>wild-type</sup></b><br><b>SOD1<sup>G37R</sup></b> | <b>NF-(M/H)<sup>tailΔ</sup></b><br><b>SOD1<sup>G37R</sup></b> |                                                           |                                                           |                       |
| <b>27 ± 2.2 (n=3)<sup>1</sup></b>                                               | <b>23 ± 1.9 (n=3)<sup>1</sup></b> | hind limb weakness:                                               | <b>12 ± 0.1 (n=3)<sup>1</sup></b>                             | <b>18 ± 0.4 (n=3)<sup>1</sup></b>                         |                                                           |                       |
| <b>47 ± 3.5 (n=3)<sup>2</sup></b>                                               | <b>41 ± 3.1 (n=3)<sup>2</sup></b> |                                                                   | <b>29 ± 4.0 (n=3)<sup>2</sup></b>                             | <b>36 ± 0.2 (n=3)<sup>2</sup></b>                         |                                                           |                       |
| <sup>1</sup> large motor neurons (>25 μm diameter)                              |                                   | end stage:                                                        | <b>7 ± 0.4 (n=3)<sup>1</sup></b>                              | <b>12 ± 0.5 (n=2)<sup>1</sup></b>                         |                                                           |                       |
| <sup>2</sup> total motor neurons                                                |                                   |                                                                   | <b>17 ± 2.3 (n=3)<sup>2</sup></b>                             | <b>28 ± 5.5 (n=2)<sup>2</sup></b>                         |                                                           |                       |
| <b>Percentage of Innervated End Plates in the Gastrocnemius Muscle</b>          |                                   |                                                                   |                                                               |                                                           |                                                           |                       |
| <b>NF-(M/H)<sup>wild-type</sup></b><br>(control mice, at 14 months and healthy) | <b>NF-(M/H)<sup>tailΔ</sup></b>   | <b>NF-(M/H)<sup>wild-type</sup></b><br><b>SOD1<sup>G37R</sup></b> | <b>NF-(M/H)<sup>tailΔ</sup></b><br><b>SOD1<sup>G37R</sup></b> |                                                           |                                                           |                       |
| <b>83 ± 7.3 (n=3)</b>                                                           | <b>ND</b>                         | hind limb weakness:                                               | <b>26 ± 2.2 (n=3)</b>                                         | <b>60 ± 5.3 (n=3)</b>                                     |                                                           |                       |
|                                                                                 |                                   | end stage:                                                        | <b>13 ± 4.2 (n=3)</b>                                         | <b>25 ± 5.9 (n=3)</b>                                     |                                                           |                       |

Results are mean ± SEM. Presymptomatic (at 6 months; before onset), hind limb weakness (at 10% weight loss; after onset), end stage (hind limb paralysis). Percentage of innervated end plates was determined as the fraction of bungarotoxin-positive endplates (postsynaptic) that were also positive for synaptophysin and NF (presynaptic). Per animal (*n*) 150 randomly chosen end plates were analyzed. ND, not determined.
