# Supplementary material
Source: PubMed Central journal article supplement (PMC1177385)

# Removal of NFs from Axons and Accumulation in Cell Bodies Strongly Delays Mutant SOD1 Induced ALS

**BUT WHY ??**

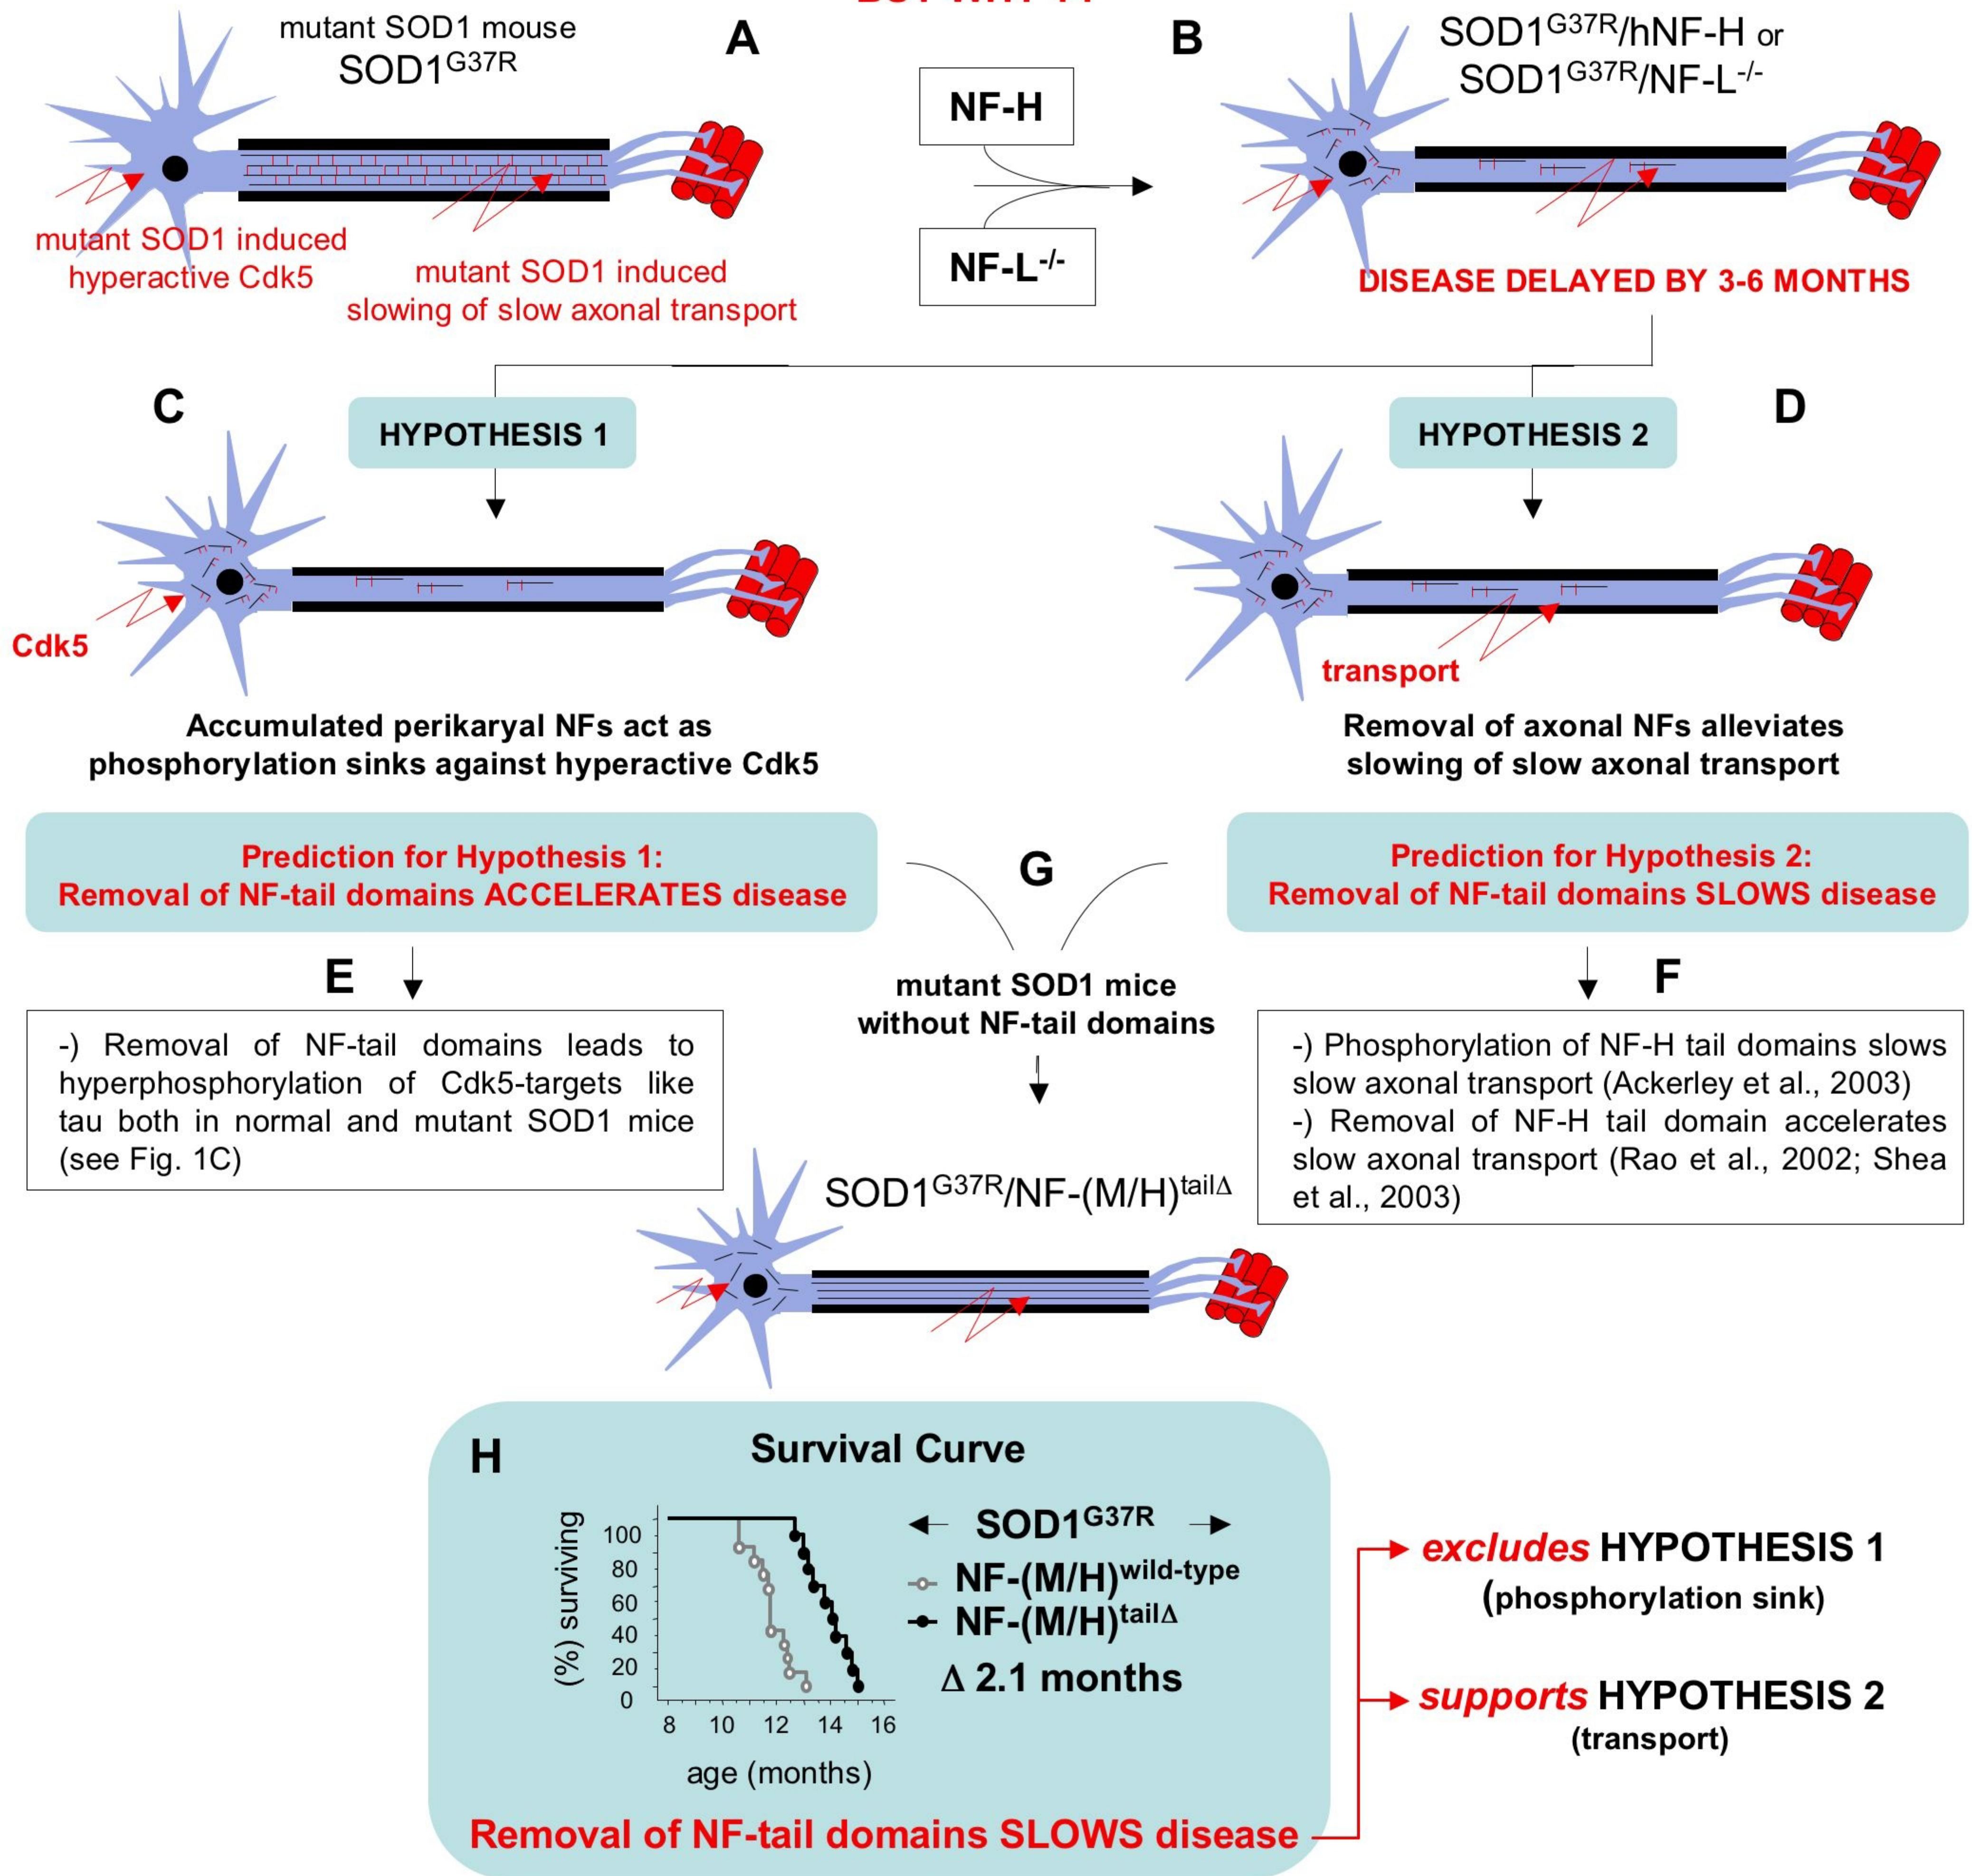

Supplement: pnas_0503862102_2.pdf [file pnas_0503862102_2.pdf]
